# Supplementary material for: Heightened BTK-dependent cell proliferation in unmutated chronic lymphocytic leukemia confers increased sensitivity to ibrutinib
Source: PubMed Central journal article supplement (PMC4826229; doi:10.18632/oncotarget.6727), 2015-12-22
Supplement: oncotarget-07-4598-s001.pdf [file oncotarget-07-4598-s001.pdf]

## Heightened BTK-dependent cell proliferation in unmutated chronic lymphocytic leukemia confers increased sensitivity to ibrutinib

### Supplementary Materials

Supplementary Table 1: Patients clinical and pathological characteristics

| Pt. #  | Age | Sex | WBC<br>( $\times 10^6/\text{mL}$ ) | Rai | Therapy | ZAP70    | IGHV  | CD38     | FISH abnormalities*                              |
|--------|-----|-----|------------------------------------|-----|---------|----------|-------|----------|--------------------------------------------------|
| CLL005 | 64  | M   | 10                                 | 1   | NT      | Negative | Mut   | Negative | del(13q14.3)                                     |
| CLL008 | 75  | M   | 10                                 | 4   | T       | Negative | Mut   | Negative | del(17p)                                         |
| CLL011 | 42  | M   | 23.9                               | 1   | T       | Positive | Unmut | Positive | Trisomy 12                                       |
| CLL015 | 56  | F   | 98.6                               | 1   | T       | Positive | Unmut | Negative | Trisomy 12                                       |
| CLL030 | 60  | M   | 42.5                               | 1   | NT      | Positive | Unmut | Negative | del(11q22.3), Trisomy 12                         |
| CLL033 | 70  | M   | 11.3                               | 1   | NT      | Negative | Mut   | Negative | del(13q14.3)                                     |
| CLL037 | 72  | F   | 84.1                               | 0   | NT      | Positive | Mut   | Negative | del(13q14.3)                                     |
| CLL038 | 72  | M   | 58                                 | 3   | NT      | Negative | Mut   | Negative | del(13q14.3)                                     |
| CLL072 | 79  | M   | 15.8                               | 1   | NT      | Positive | Mut   | Negative | del(13q14.3)                                     |
| CLL074 | 41  | M   | 18.2                               | 1   | T       | Positive | Mut   | Negative | del(13q14.3)                                     |
| CLL082 | 82  | F   | 22                                 | 4   | NT      | Negative | Mut   | Negative | del(11q22.3), del(13q14.3)                       |
| CLL085 | 66  | M   | 11.3                               | 4   | T       | Positive | Unmut | Negative | del(11q22.3), del(13q14.3), del(17p)             |
| CLL087 | 79  | M   | 71.5                               | 0   | NT      | Positive | Mut   | Negative | del(17p)                                         |
| CLL088 | 87  | M   | 137                                | 4   | NT      | Positive | Unmut | Negative | del(11q22.3), Trisomy 12                         |
| CLL094 | 62  | F   | 54.8                               | 1   | NT      | Negative | Mut   | Negative | del(13q14.3)                                     |
| CLL095 | 80  | F   | 93                                 | 1   | NT      | Positive | Unmut | Negative | del(13q14.3), del(17p)                           |
| CLL111 | 56  | F   | 41.8                               | 1   | NT      | Positive | Mut   | Negative | del(13q14.3)                                     |
| CLL113 | 65  | F   | 92                                 | 1   | T       | Positive | Unmut | Negative | normal                                           |
| CLL116 | 69  | M   | 85                                 | 3   | NT      | Positive | Unmut | Negative | trisomy 12                                       |
| CLL117 | 70  | M   | 62.3                               | 2   | T       | Positive | Unmut | Negative | del(11q22.3)                                     |
| CLL124 | 60  | F   | 29.7                               | 0   | NT      | Negative | Mut   | Negative | del(13q14.3)                                     |
| CLL131 | 48  | M   | 19.7                               | 4   | T       | Negative | Unmut | Positive | del(11q22.3)                                     |
| CLL143 | 75  | M   | 89.6                               | 4   | NT      | Positive | Unmut | Negative | Trisomy 12, del(13q14.3)                         |
| CLL153 | 53  | M   | 23                                 | 2   | NT      | Negative | Mut   | Negative | trisomy 12                                       |
| CLL156 | 75  | F   | 196                                | 2   | NT      | Negative | Unmut | Negative | del(13q14.3)                                     |
| CLL158 | 54  | F   | 19.4                               | 0   | NT      | Negative | Unmut | Negative | normal                                           |
| CLL162 | 60  | M   | 40                                 | 0   | NT      | Negative | Mut   | Negative | del(13q14.3)                                     |
| CLL179 | 62  | M   | 28                                 | 3   | T       | Positive | Unmut | Negative | del(11q22.3), del(13q14.3)                       |
| CLL187 | 92  | F   | 48                                 | 2   | NT      | Negative | Mut   | Negative | normal                                           |
| CLL189 | 60  | M   | 201.3                              | 4   | T       | Negative | Unmut | Negative | del(11q22.3), del(13q14.3)                       |
| CLL195 | 67  | M   | 299.2                              | 4   | T       | Positive | Unmut | Negative | del(11q22.3), Trisomy 12, del(13q14.3), del(17p) |
| CLL208 | 60  | F   | 103                                | 0   | NT      | Negative | Mut   | Negative | del(13q14.3)                                     |
| CLL223 | 62  | F   | 75.6                               | 2   | NT      | Positive | Mut   | Negative | del(13q14.3)                                     |

|        |    |   |      |   |    |          |       |          |                                                  |
|--------|----|---|------|---|----|----------|-------|----------|--------------------------------------------------|
| CLL230 | 66 | M | 20   | 4 | NT | Positive | Unmut | Positive | del(13q14.3), del(17p)                           |
| CLL232 | 77 | M | 43.3 | 1 | NT | Positive | Mut   | Negative | Trisomy 12                                       |
| CLL235 | 66 | M | 100  | 4 | T  | Positive | Unmut | Negative | del(11q22.3), Trisomy 12, del(13q14.3), del(17p) |
| CLL239 | 57 | M | 74.1 | 4 | NT | Positive | Unmut | Negative | del(17p)                                         |
| CLL248 | 67 | F | 65   | 3 | NT | Negative | Mut   | Negative | del(13q14.3)                                     |
| CLL254 | 55 | M | 53   | 1 | NT | Negative | Mut   | Negative | del(13q14.3)                                     |
| CLL259 | 58 | M | 18   | 3 | NT | Negative | Mut   | Negative | del(13q14.3)                                     |
| CLL262 | 58 | F | 95   | 4 | NT | Negative | Unmut | Negative | normal                                           |
| CLL266 | 35 | M | 87.5 | 4 | T  | Positive | Unmut | Negative | del(13q14.3)                                     |
| CLL271 | 48 | F | 42   | 1 | NT | Positive | Mut   | Negative | del(13q14.3)                                     |
| CLL275 | 84 | M | 88   | 4 | T  | Negative | Unmut | Negative | del(11q22.3), Trisomy 12                         |
| CLL285 | 61 | M | 41   | 3 | NT | Negative | Mut   | Negative | normal                                           |
| CLL282 | 64 | M | 55   | 3 | T  | Negative | Unmut | Negative | Trisomy 12                                       |
| CLL288 | 78 | M | 67   | 4 | NT | Positive | Unmut | Negative | Trisomy 12                                       |
| CLL292 | 77 | F | 112  | 4 | T  | Negative | Unmut | Negative | del(13q14.3), del(17p)                           |
| CLL307 | 62 | M | 86   | 3 | T  | Positive | Unmut | Negative | del(17p)                                         |
| CLL310 | 31 | F | 32.8 | 2 | NT | Negative | Mut   | Negative | del(13q14.3)                                     |
| CLL311 | 68 | M | 112  | 3 | T  | Negative | Unmut | Negative | Trisomy 12, del(17p)                             |
| CLL313 | 64 | M | 70   | 4 | T  | Negative | Unmut | Negative | del(13q14.3), del(17p)                           |
| CLL314 | 56 | M | 228  | 4 | T  | N/A      | Unmut | N/A      | N/A                                              |
| CLL320 | 65 | F | 168  | 4 | NT | Positive | Unmut | Negative | del(11q22.3), del(13q14.3)                       |
| CLL322 | 53 | F | 19   | 4 | T  | Positive | Unmut | Negative | trisomy 12                                       |
| CLL348 | 55 | M | 220  | 4 | NT | N/A      | Unmut | N/A      | N/A                                              |
| CLL360 | 47 | M | 281  | 2 | NT | Negative | Mut   | Negative | del(13q14.3)                                     |
| CLL371 | 58 | M | 141  | 4 | T  | Negative | Unmut | Negative | Trisomy 12, del(17p)                             |

Abbreviations: CLL, chronic lymphocytic leukemia; F, female; FISH, fluorescence in situ hybridization (only abnormalities detected in  $\geq 5\%$  of cells are shown); IGHV, immunoglobulin heavy chain variable region genes; M, male; Mut, mutated; N/A, not available; NT, not treated; T, treated; Unmut, unmutated; WBC, white blood cells count.

\*CLL FISH panel: del(11q22.3)(ATM), trisomy 12, del(13q14.3/34), del(17p13.1)(TP53).
